# Supplementary material for: Simultaneous fluorescence and phosphorescence in Zn(ii)–zwitterionic coordination polymers with tunable colors
Source: Royal Society of Chemistry journal article supplement (doi:10.1039/d0tc06109c), 2021-01-01
Supplement: d0tc06109c1.pdf [file d0tc06109c1.pdf]

## Supporting Information

### Computational Descriptions

Within the framework of density functional theory, the electronic structure properties for 1, 2 and 3 were simulated using the Vienna ab initio simulation package (VASP).<sup>1</sup> The Perdew-Burke-Ernzerhof functional with the generalized gradient approximation (PBE-GGA) was used for electron exchange-correlation, and the projector-augmented-wave (PAW) method were adopted to describe the inert core electrons.<sup>2,3</sup> A kinetic energy cutoff of 400 eV and a gamma-centered k-point grid of  $4 \times 4 \times 2$  were used for all calculations. The valence electron for each element is Zn  $4s^23d^{10}$ , C  $2s^22p^2$ , O  $2s^22p^4$ , N  $2s^22p^3$  and H  $1s^1$ . In addition, the DFT-D3 dispersion correction method of Grimme et al. was considered because of the weak interactions found in systems.<sup>4</sup> Starting with the X-ray crystal data, the lattice parameters and the atomic positions were fully relaxed until the energy difference is less than  $10^{-5}$  eV and the force is smaller than  $10^{-2}$  eV/Å. The calculated results of the electronic band structure and density of states were treated by the powerful high throughput analysis software, VASPKIT.<sup>5</sup>

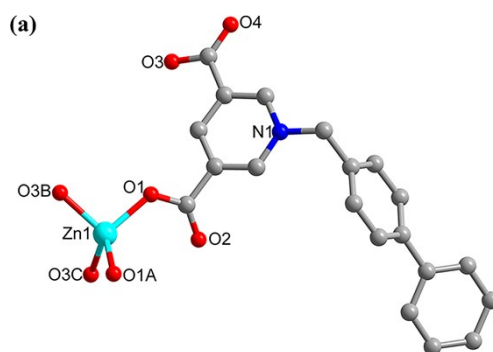

Symmetry codes: A = 1 - x, y, 1/2 - z; B = 1 - x, 3 - y, 1 - z; C = x, 3 - y, -1/2 + z.

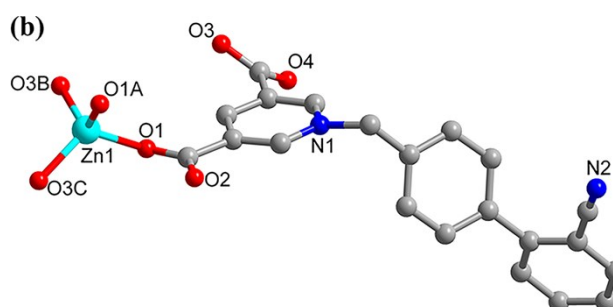

Symmetry codes: A = 1 - x, y, 3/2 - z; B = 1 - x, 2 - y, 1 - z; C = x, 2 - y, 1/2 + z.

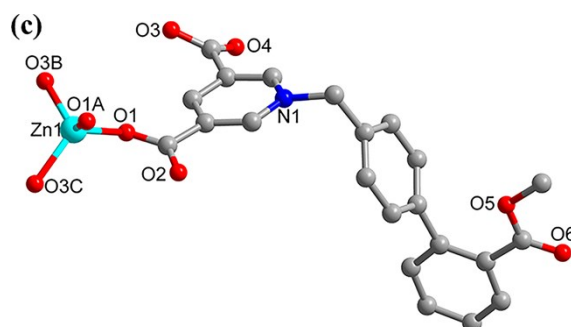

Symmetry codes: A = 1 - x, y, 3/2 - z; B = 1 - x, 2 - y, 1 - z; C = x, 2 - y, 1/2 + z.

**Figure S1.** The coordination environments of Zn(II) cations of (a) **1**, (b) **2**, and (c) **3**. All H atoms are omitted for clarity.

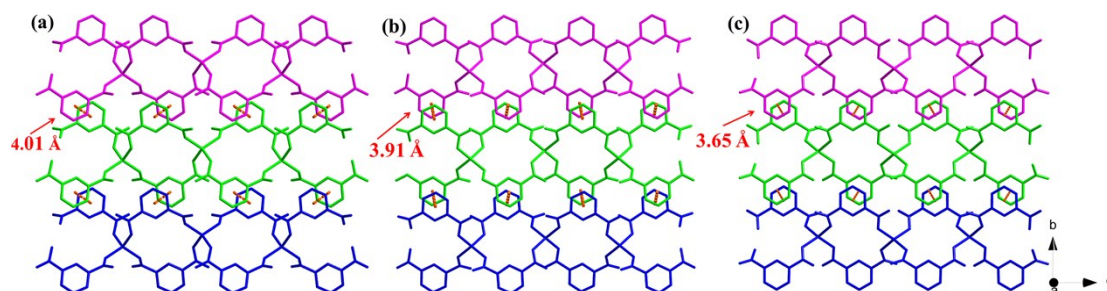

**Figure S2.** Representations viewed along a-axis of the centroid-to-centroid distance of adjacent pyridine rings for (a) **1**, (b) **2**, and (c) **3**. The biphenyl rings are omitted for clarity.

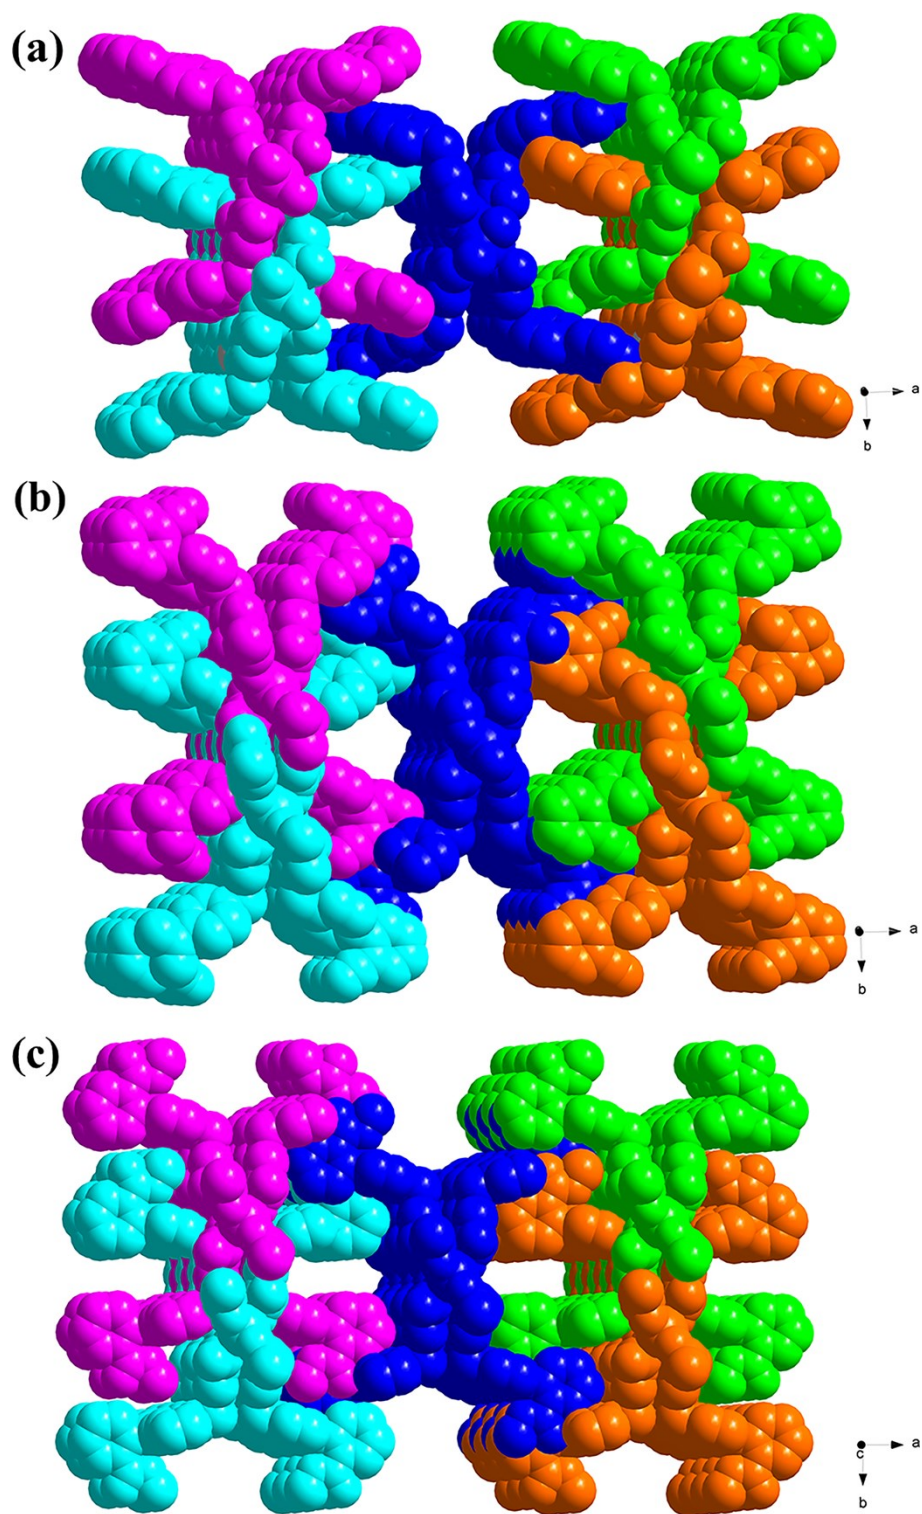

**Figure S3.** Three-dimension supramoleculars of (a) **1**, (b) **2**, and (c) **3** in space-filling modes.

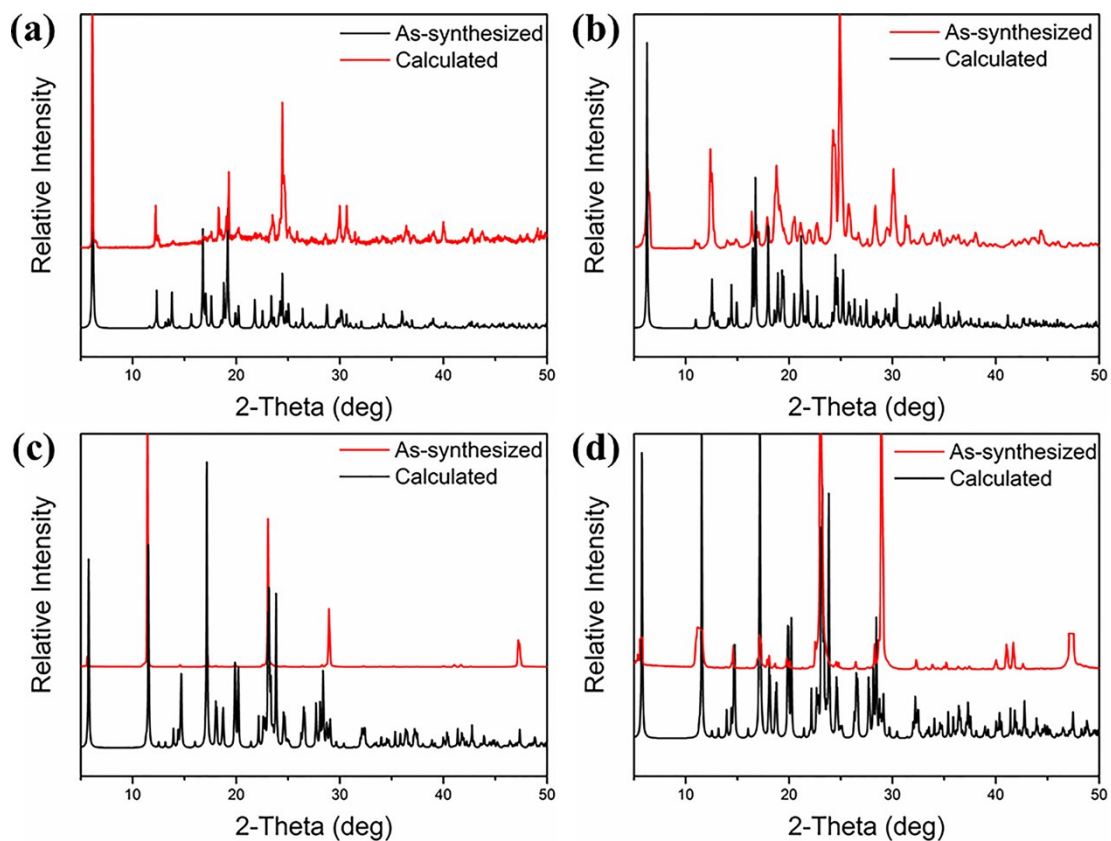

**Figure S4.** As-synthesized and calculated PXRD patterns of (a) **1**, (b) **2**, and (c) **3**, (d) because some peaks are too strong to cover other peaks, we deleted data over a certain intensity of (c).

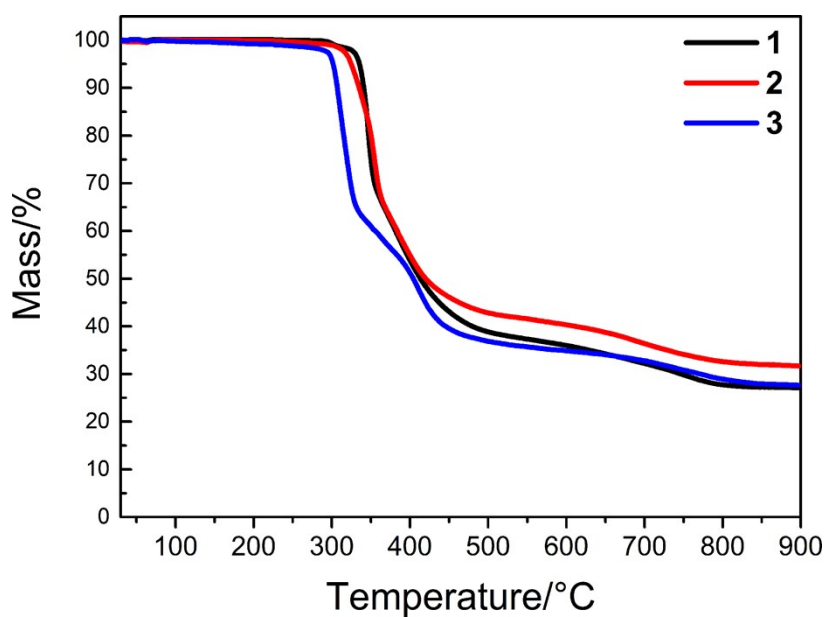

**Figure S5.** The TGA curves of **1** - **3**.

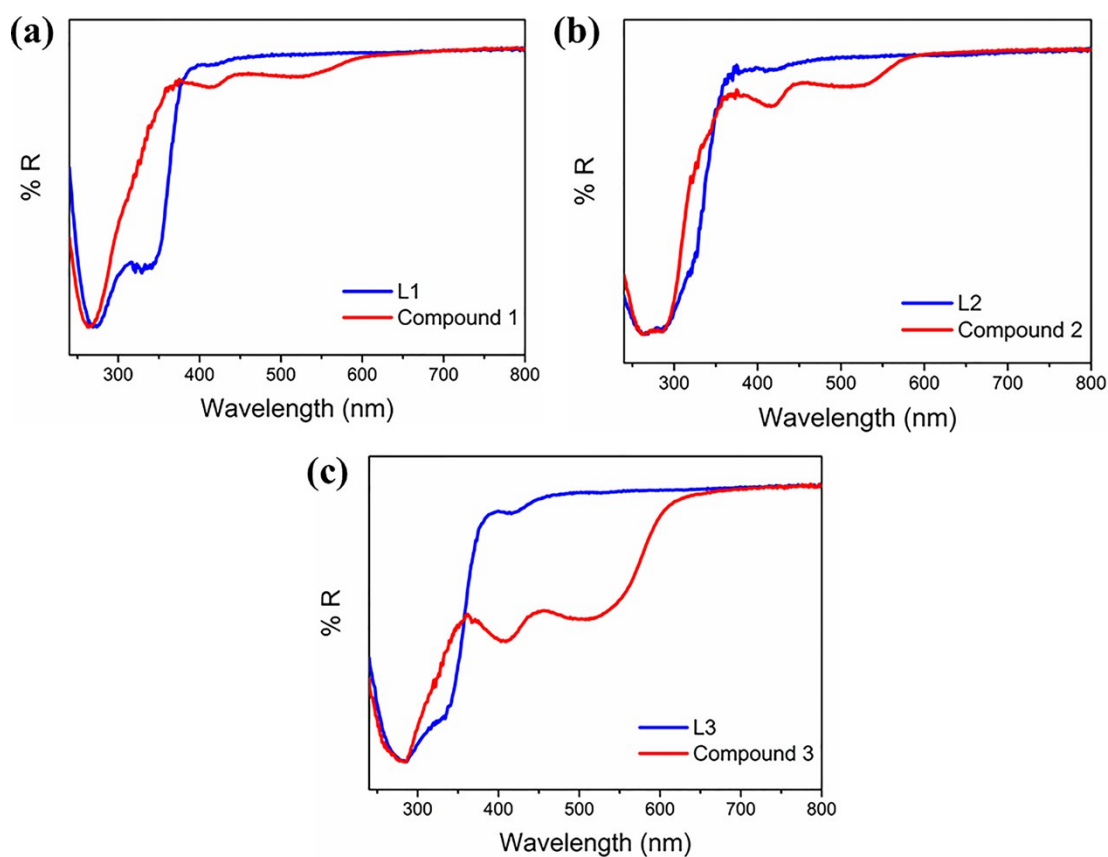

**Figure S6.** UV-vis spectra of (a) L1 and **1**, (b) L2 and **2**, and (c) L3 and **3** (Y-axis has been normalized to [0, 1]).

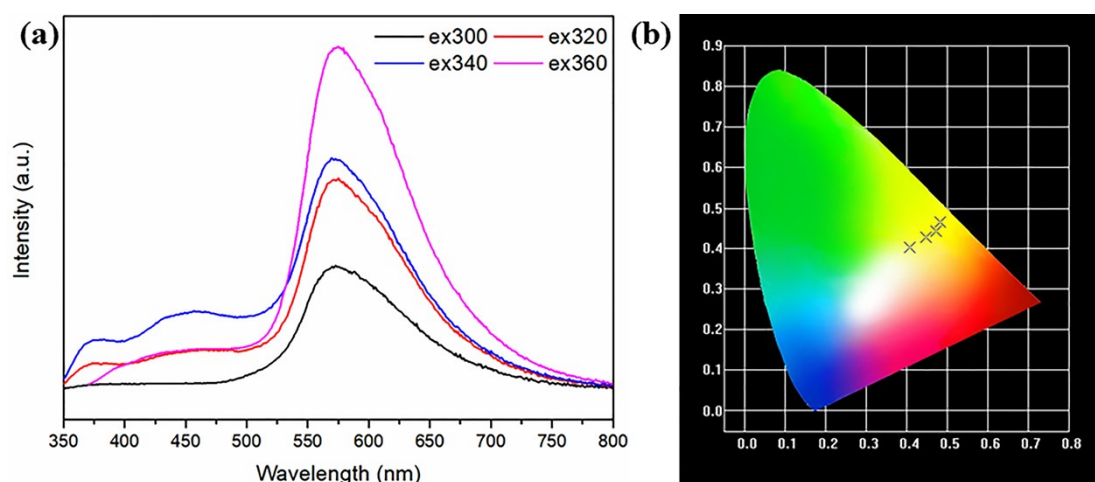

**Figure S7.** (a) Solid state emission spectra of **2** by variation of excitation wavelengths at 298K, (b) CIE-1931 chromaticity diagram of the emission spectra corresponding to (a).

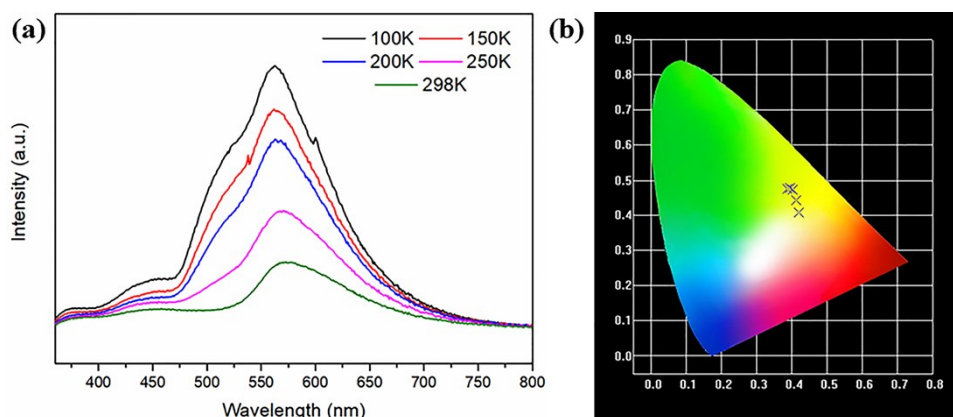

**Figure S8.** (a) Solid state emission spectra of **2** with different temperature under an excitation of 340 nm, (b) CIE-1931 chromaticity diagram of the emission spectra corresponding to (a).

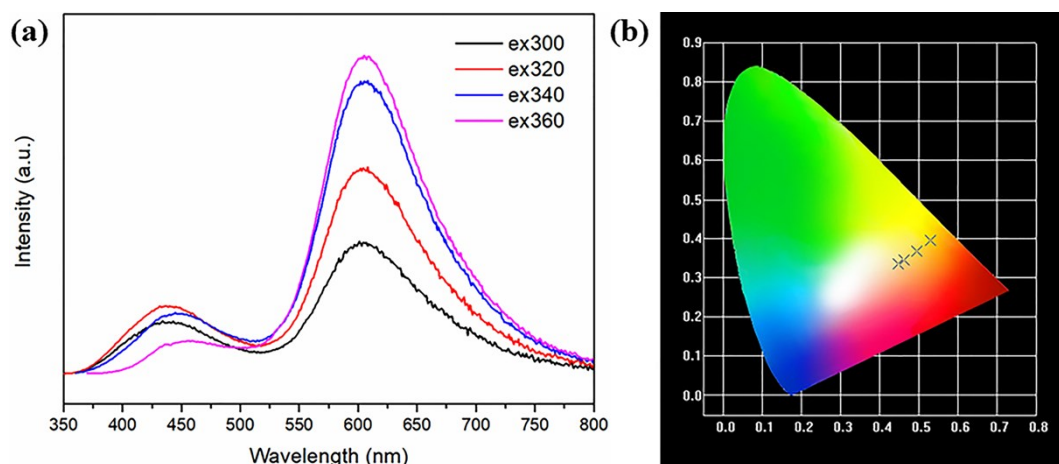

**Figure S9.** (a) Solid state emission spectra of compound **3** by variation of excitation light at 298K, (b) CIE-1931 chromaticity diagram of the emission spectra corresponding to (a).

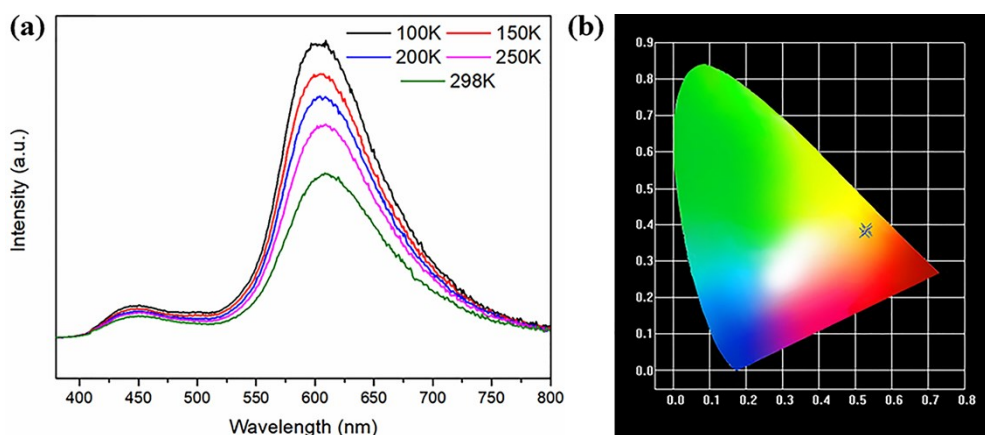

**Figure S10.** (a) Solid state emission spectra of **3** with different temperature under an excitation of 360 nm. (b) CIE-1931 chromaticity diagram of the emission spectra corresponding to (a).

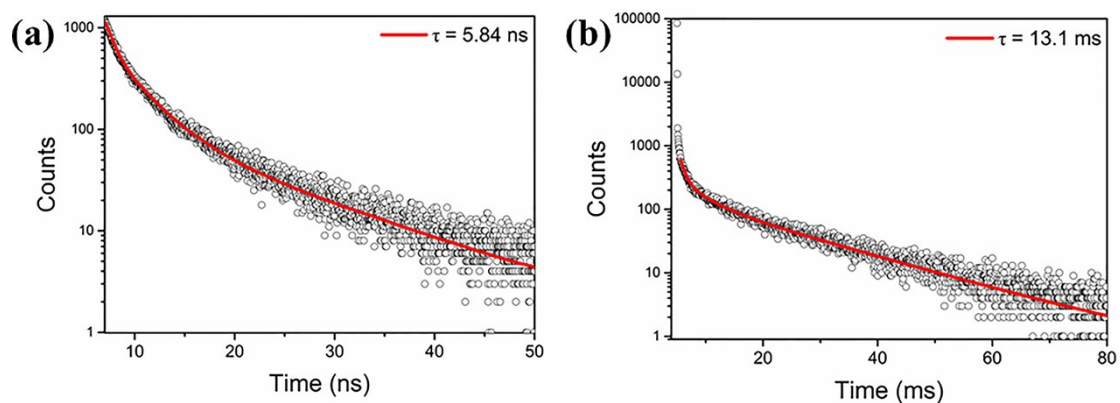

**Figure S11.** PL decay curves of **1** (a) with excitation at 375 nm and the emission peaks at 420 nm, (b) with excitation at 350 nm and the emission peaks at 580 nm in solid state at room temperature.

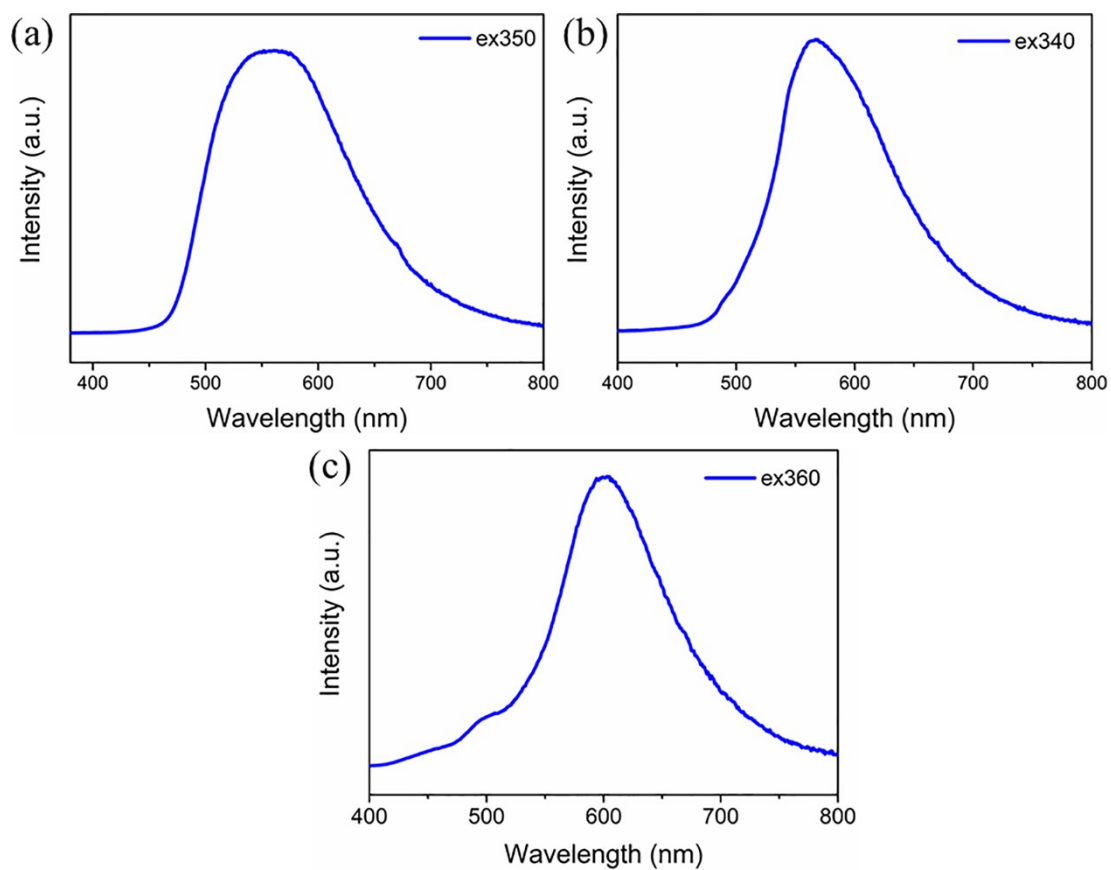

**Figure S12.** Phosphorescence spectra recorded at room temperature of (a) **1**, (b) **2** and (c) **3** with a delay time in the range of 1000-200000  $\mu$ s.

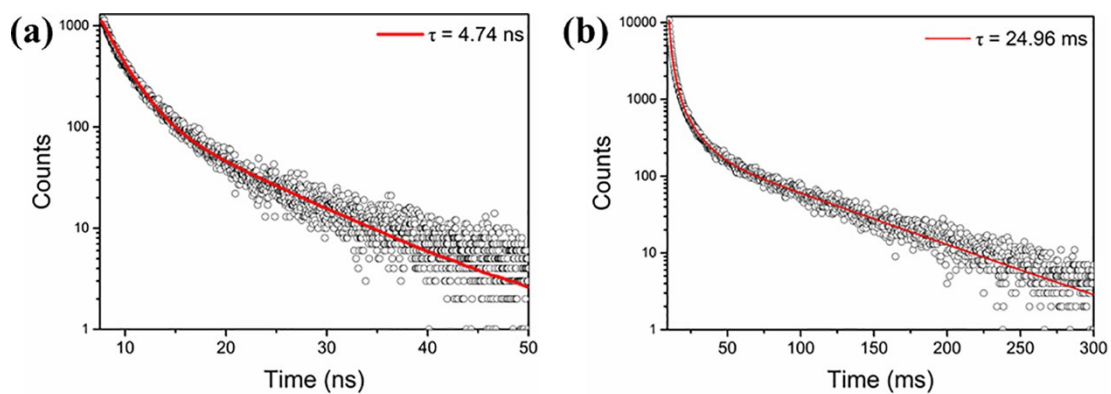

**Figure S13.** PL decay curves of **2** (a) with excitation at 375 nm and the emission peaks at 450 nm, (b) with excitation at 340 nm and the emission peaks at 570 nm in solid state at room temperature.

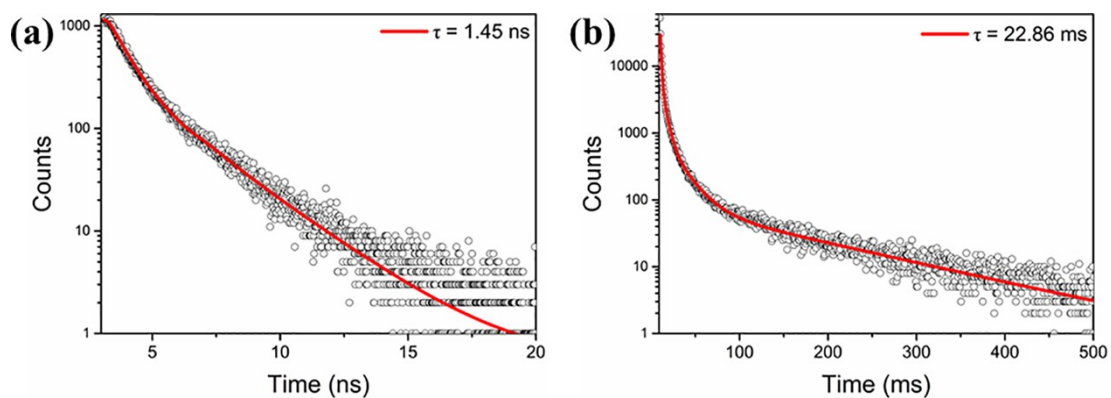

**Figure S14.** PL decay curves of **3** (a) with excitation at 375 nm and the emission peaks at 450 nm, (b) with excitation at 360 nm and the emission peaks at 605 nm in solid state at room temperature.



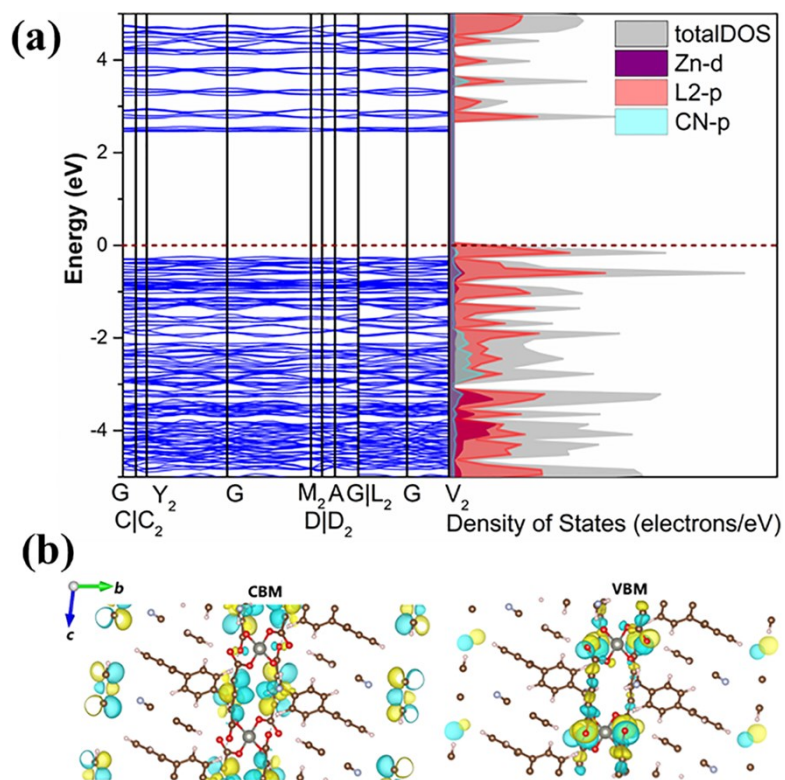

**Figure S15.** Calculated electronic structure properties of **2**. (a) Calculated band structure and projected density of states. (b) Calculated charge densities of the CBM and VBM.

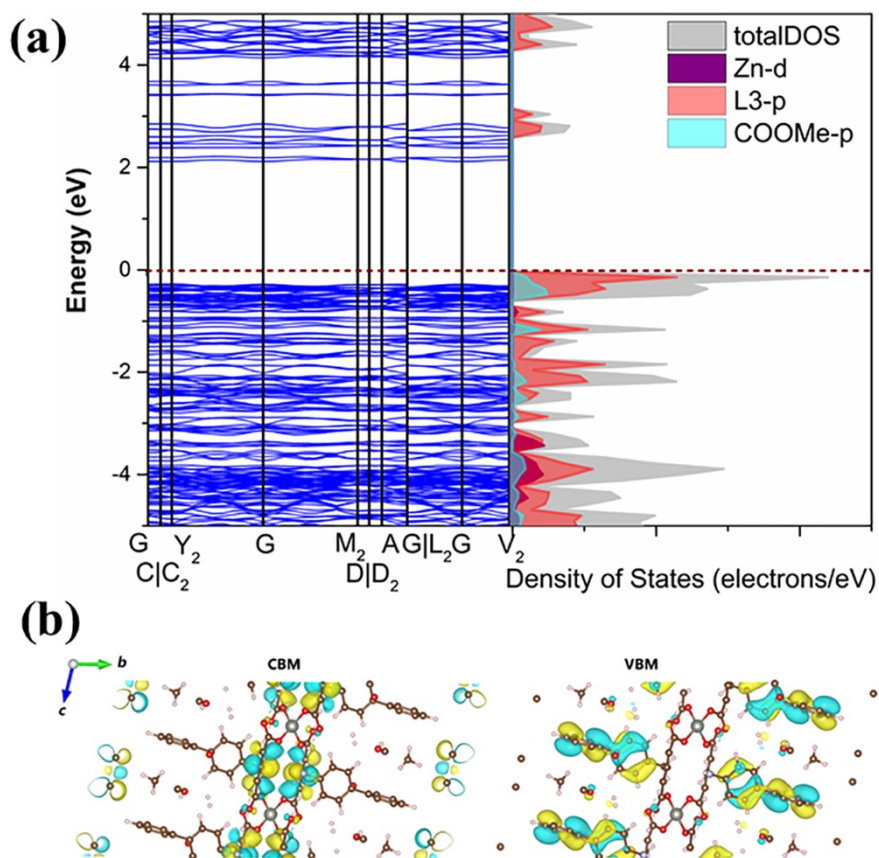

**Figure S16.** Calculated electronic structure properties of **3**. (a) Calculated band

structure and projected density of states. (b) Calculated charge densities of the CBM and VBM.

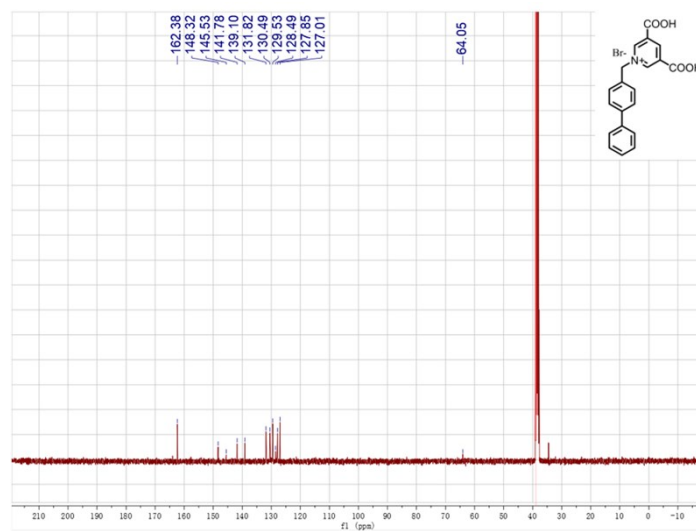

L1 (100 MHz, DMSO-d<sub>6</sub>)

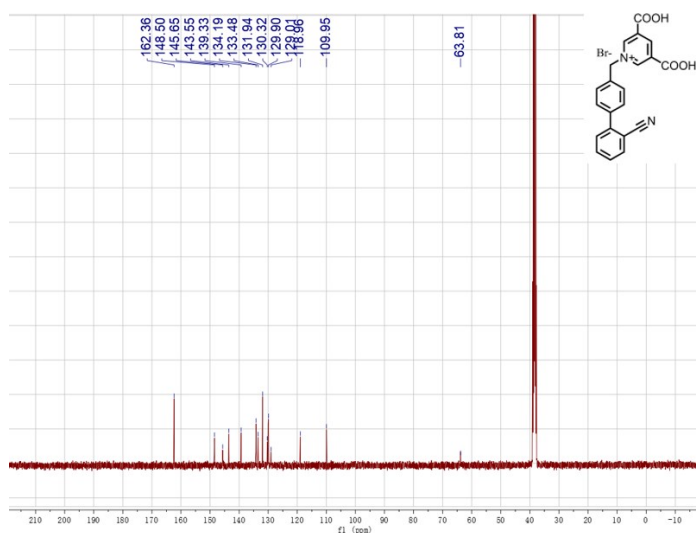

L2 (100 MHz, DMSO-d<sub>6</sub>)

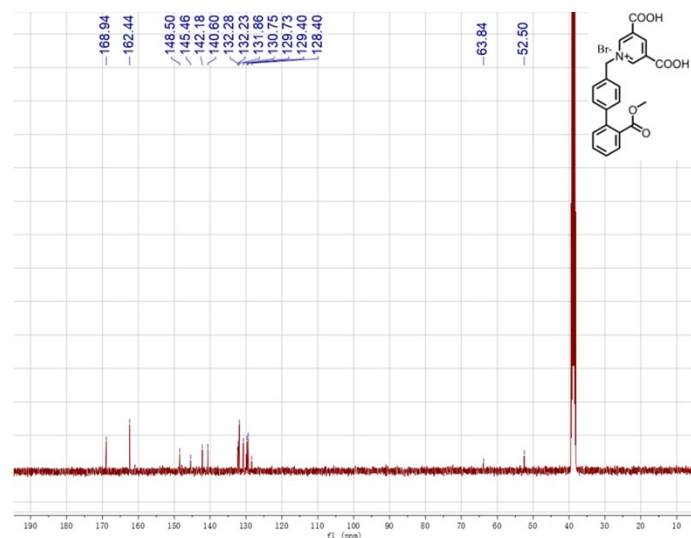

L3 (100 MHz, DMSO-d<sub>6</sub>)

**Figure S17.** <sup>13</sup>C NMR spectra for L1–L3.

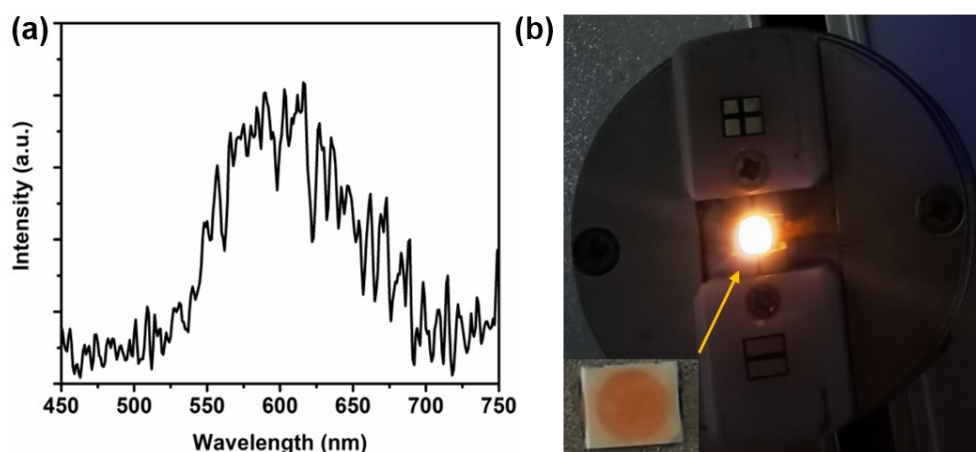

**Figure S18.** The LED fabrication and performance test. (a) the PL spectra corresponding to the LED. (b) The photograph of the LED.

**Table S1. Crystal data and structure refinements for 1–3.**

| Identification code                         | 1                                                             | 2                                                                | 3                                                                 |
|---------------------------------------------|---------------------------------------------------------------|------------------------------------------------------------------|-------------------------------------------------------------------|
| Empirical formula                           | C <sub>40</sub> N <sub>2</sub> O <sub>8</sub> Zn              | C <sub>42</sub> H <sub>26</sub> N <sub>4</sub> O <sub>8</sub> Zn | C <sub>44</sub> H <sub>32</sub> N <sub>2</sub> O <sub>12</sub> Zn |
| Formula weight                              | 701.85                                                        | 780.04                                                           | 846.08                                                            |
| Temperature/K                               | 150                                                           | 150                                                              | 150                                                               |
| Crystal system                              | monoclinic                                                    | monoclinic                                                       | monoclinic                                                        |
| Space group                                 | <i>C2/c</i>                                                   | <i>C2/c</i>                                                      | <i>C2/c</i>                                                       |
| <i>a</i> /Å                                 | 28.7233(13)                                                   | 28.4195(4)                                                       | 31.2645(7)                                                        |
| <i>b</i> /Å                                 | 7.8826(3)                                                     | 8.40750(10)                                                      | 8.0713(2)                                                         |
| <i>c</i> /Å                                 | 14.5754(5)                                                    | 14.5457(2)                                                       | 14.8768(3)                                                        |
| <i>α</i> /°                                 | 90                                                            | 90                                                               | 90                                                                |
| <i>β</i> /°                                 | 91.791(4)                                                     | 96.8570(10)                                                      | 103.092(2)                                                        |
| <i>γ</i> /°                                 | 90                                                            | 90                                                               | 90                                                                |
| <i>Volume</i> /Å <sup>3</sup>               | 3298.5(2)                                                     | 3450.65(8)                                                       | 3656.51(15)                                                       |
| <i>Z</i>                                    | 4                                                             | 4                                                                | 4                                                                 |
| <i>ρ</i> <sub>calc</sub> /g/cm <sup>3</sup> | 1.4132                                                        | 1.501                                                            | 1.537                                                             |
| <i>μ</i> /mm <sup>-1</sup>                  | 0.803                                                         | 0.996                                                            | 1.013                                                             |
| <i>F</i> (000)                              | 1394.0                                                        | 1600.0                                                           | 1744.0                                                            |
| Radiation                                   | MoKα (λ = 0.71073)                                            | GaKα (λ = 1.3405)                                                | GaKα (λ = 1.3405)                                                 |
| 2θ range for data collection/°              | 7.2 to 59.3                                                   | 9.544 to 121.178                                                 | 5.046 to 121.396                                                  |
| Index ranges                                | -38 ≤ <i>h</i> ≤ 38, -10 ≤ <i>k</i> ≤ 10, -18 ≤ <i>l</i> ≤ 20 | -36 ≤ <i>h</i> ≤ 36, -10 ≤ <i>k</i> ≤ 8, -18 ≤ <i>l</i> ≤ 18     | -39 ≤ <i>h</i> ≤ 40, -9 ≤ <i>k</i> ≤ 10, -11 ≤ <i>l</i> ≤ 19      |
| Reflections collected                       | 11352                                                         | 14275                                                            | 15479                                                             |
| Independent reflections                     | 4035 [R <sub>int</sub> = 0.0251, R <sub>sigma</sub> = 0.0305] | 3857 [R <sub>int</sub> = 0.0237, R <sub>sigma</sub> = 0.0199]    | 4099 [R <sub>int</sub> = 0.0291, R <sub>sigma</sub> = 0.0233]     |
| Data/restraints/parameters                  | 4035/0/231                                                    | 3857/0/249                                                       | 4099/0/268                                                        |
| Goodness-of-fit on F <sup>2</sup>           | 1.105                                                         | 1.029                                                            | 1.096                                                             |
| Final R indexes [I ≥ 2σ (I)]                | R <sub>1</sub> = 0.0485, wR <sub>2</sub> = 0.1366             | R <sub>1</sub> = 0.0309, wR <sub>2</sub> = 0.0845                | R <sub>1</sub> = 0.0389, wR <sub>2</sub> = 0.0914                 |
| Final R indexes [all data]                  | R <sub>1</sub> = 0.0541, wR <sub>2</sub> = 0.1408             | R <sub>1</sub> = 0.0324, wR <sub>2</sub> = 0.0856                | R <sub>1</sub> = 0.0420, wR <sub>2</sub> = 0.0931                 |
| Largest diff. peak/hole / e Å <sup>-3</sup> | 1.05/-0.40                                                    | 0.70/-0.40                                                       | 0.44/-0.38                                                        |

$$R1 = \sum ||F_o| - |F_c|| / \sum |F_o|, wR2 = [\sum w(F_o^2 - F_c^2)^2 / \sum w(F_o^2)]^{1/2}$$

**Table S2. Bond Lengths for 1–3.**

|                  |     | 1               |            | 2   |                  | 3          |     |                 |            |
|------------------|-----|-----------------|------------|-----|------------------|------------|-----|-----------------|------------|
| Atom Atom        |     | Length/Å        | Atom Atom  |     | Length/Å         | Atom Atom  |     | Length/Å        |            |
| 1 <sup>1</sup> - | Zn1 | O1 <sup>1</sup> | 1.9349(19) | Zn1 | O1 <sup>1</sup>  | 1.9295(10) | Zn1 | O1 <sup>1</sup> | 1.9306(13) |
|                  | Zn1 | O1              | 1.9349(19) | Zn1 | O1               | 1.9295(10) | Zn1 | O1              | 1.9307(13) |
|                  | Zn1 | O3 <sup>2</sup> | 1.937(2)   | Zn1 | O3 <sup>2</sup>  | 1.9362(10) | Zn1 | O3 <sup>2</sup> | 1.9334(13) |
|                  | Zn1 | O3 <sup>3</sup> | 1.937(2)   | Zn1 | O3 <sup>3</sup>  | 1.9362(10) | Zn1 | O3 <sup>3</sup> | 1.9334(13) |
|                  | O1  | C1              | 1.279(4)   | O2  | C1               | 1.2204(17) | O1  | C1              | 1.261(2)   |
|                  | O2  | C1              | 1.223(3)   | O1  | C1               | 1.2746(17) | O2  | C1              | 1.208(2)   |
|                  | O3  | C7              | 1.279(3)   | O3  | Zn1 <sup>2</sup> | 1.9362(10) | O3  | C5              | 1.269(2)   |
|                  | O4  | C7              | 1.229(3)   | O3  | C7               | 1.2701(17) | O4  | C5              | 1.214(2)   |
|                  | N1  | C5              | 1.348(3)   | O4  | C7               | 1.2218(17) | O5  | C21             | 1.328(2)   |
|                  | N1  | C6              | 1.356(3)   | N1  | C5               | 1.3522(17) | O5  | C22             | 1.444(2)   |
|                  | N1  | C8              | 1.508(3)   | N1  | C6               | 1.3471(17) | O6  | C21             | 1.208(2)   |
|                  | C1  | C2              | 1.514(3)   | N1  | C8               | 1.4940(17) | N1  | C7              | 1.352(2)   |
|                  | C2  | C3              | 1.393(4)   | N2  | C21              | 1.142(2)   | N1  | C6              | 1.353(2)   |
|                  | C2  | C6              | 1.382(4)   | C1  | C2               | 1.5200(17) | N1  | C8              | 1.502(2)   |
|                  | C3  | C4              | 1.391(4)   | C2  | C3               | 1.3833(17) | C1  | C2              | 1.518(2)   |
|                  | C4  | C5              | 1.382(4)   | C2  | C6               | 1.3788(19) | C2  | C7              | 1.378(2)   |
|                  | C4  | C7              | 1.511(4)   | C3  | C4               | 1.3911(18) | C2  | C3              | 1.390(2)   |
|                  | C8  | C9              | 1.505(4)   | C4  | C5               | 1.3764(19) | C3  | C4              | 1.386(2)   |
|                  | C9  | C10             | 1.398(4)   | C4  | C7               | 1.5138(17) | C4  | C6              | 1.376(2)   |
|                  | C9  | C14             | 1.403(4)   | C8  | C9               | 1.5018(19) | C4  | C5              | 1.520(2)   |
|                  | C10 | C11             | 1.391(4)   | C9  | C10              | 1.387(2)   | C8  | C9              | 1.505(2)   |
|                  | C11 | C12             | 1.404(4)   | C9  | C13              | 1.385(2)   | C9  | C10             | 1.387(2)   |
|                  | C12 | C13             | 1.400(4)   | C10 | C11              | 1.382(2)   | C9  | C14             | 1.391(2)   |
|                  | C12 | C15             | 1.485(4)   | C11 | C12              | 1.388(2)   | C10 | C11             | 1.391(3)   |
|                  | C13 | C14             | 1.390(4)   | C12 | C14              | 1.389(2)   | C11 | C12             | 1.388(2)   |
|                  | C15 | C16             | 1.406(4)   | C12 | C15              | 1.485(2)   | C12 | C13             | 1.389(2)   |
|                  | C15 | C20             | 1.403(4)   | C13 | C14              | 1.391(2)   | C12 | C15             | 1.498(2)   |
|                  | C16 | C17             | 1.399(4)   | C15 | C16              | 1.395(2)   | C13 | C14             | 1.387(3)   |
|                  | C17 | C18             | 1.394(5)   | C15 | C20              | 1.400(2)   | C15 | C16             | 1.398(3)   |
|                  | C18 | C19             | 1.402(5)   | C16 | C17              | 1.389(3)   | C15 | C20             | 1.402(2)   |
|                  | C19 | C20             | 1.395(4)   | C17 | C18              | 1.378(3)   | C16 | C17             | 1.388(3)   |
|                  |     |                 |            | C18 | C19              | 1.373(3)   | C17 | C18             | 1.381(3)   |
|                  |     |                 |            | C19 | C20              | 1.399(2)   | C18 | C19             | 1.379(3)   |
|                  |     |                 |            | C20 | C21              | 1.445(2)   | C19 | C20             | 1.402(2)   |
|                  |     |                 |            |     |                  | C20        | C21 | 1.493(2)        |            |

X,+Y,1/2-Z;<sup>2</sup>1-X,3-Y,1-Z;<sup>3</sup>+X,3-Y,-1/2+Z; **2** <sup>1</sup>1-X,+Y,3/2-Z;<sup>2</sup>1-X,2-Y,1-Z;<sup>3</sup>+X,2-Y,1/2+Z

**3** <sup>1</sup>1-X,+Y,3/2-Z;<sup>2</sup>+X,2-Y,1/2+Z;<sup>3</sup>1-X,2-Y,1-Z

**Table S3. Bond Angles for Compound 1–3.**

| 1               |      |                  |            | 2               |      |                  |            | 3               |      |                  |            |
|-----------------|------|------------------|------------|-----------------|------|------------------|------------|-----------------|------|------------------|------------|
| Atom            | Atom | Atom             | Angle/°    | Atom            | Atom | Atom             | Angle/°    | Atom            | Atom | Atom             | Angle/°    |
| O1              | Zn1  | O1 <sup>1</sup>  | 114.78(14) | O1 <sup>1</sup> | Zn1  | O1               | 112.03(6)  | O1 <sup>1</sup> | Zn1  | O1               | 117.73(9)  |
| O3 <sup>2</sup> | Zn1  | O1               | 97.13(9)   | O1 <sup>1</sup> | Zn1  | O3 <sup>2</sup>  | 120.03(5)  | O1 <sup>1</sup> | Zn1  | O3 <sup>2</sup>  | 90.10(6)   |
| O3 <sup>3</sup> | Zn1  | O1 <sup>1</sup>  | 97.13(9)   | O1              | Zn1  | O3 <sup>2</sup>  | 96.66(4)   | O1              | Zn1  | O3 <sup>2</sup>  | 122.74(7)  |
| O3 <sup>2</sup> | Zn1  | O1 <sup>1</sup>  | 120.58(9)  | O1              | Zn1  | O3 <sup>3</sup>  | 120.03(5)  | O1 <sup>1</sup> | Zn1  | O3 <sup>3</sup>  | 122.74(7)  |
| O3 <sup>3</sup> | Zn1  | O1               | 120.58(9)  | O1 <sup>1</sup> | Zn1  | O3 <sup>3</sup>  | 96.66(4)   | O1              | Zn1  | O3 <sup>3</sup>  | 90.10(6)   |
| O3 <sup>3</sup> | Zn1  | O3 <sup>2</sup>  | 108.09(12) | O3 <sup>3</sup> | Zn1  | O3 <sup>2</sup>  | 113.07(7)  | O3 <sup>2</sup> | Zn1  | O3 <sup>3</sup>  | 116.72(10) |
| C1              | O1   | Zn1 <sup>1</sup> | 123.69(18) | C1              | O1   | Zn1              | 123.70(9)  | C1              | O1   | Zn1              | 124.99(12) |
| C7              | O3   | Zn1 <sup>4</sup> | 124.20(18) | C7              | O3   | Zn1 <sup>2</sup> | 128.86(9)  | C5              | O3   | Zn1 <sup>3</sup> | 126.40(11) |
| C6              | N1   | C5               | 122.0(2)   | C5              | N1   | C8               | 119.31(12) | C21             | O5   | C22              | 114.54(15) |
| C8              | N1   | C5               | 118.2(2)   | C6              | N1   | C5               | 121.80(12) | C7              | N1   | C6               | 121.51(15) |
| C8              | N1   | C6               | 119.7(2)   | C6              | N1   | C8               | 118.76(11) | C7              | N1   | C8               | 119.84(14) |
| O2              | C1   | O1               | 128.0(2)   | O2              | C1   | O1               | 127.79(13) | C6              | N1   | C8               | 118.64(14) |
| C2              | C1   | O1               | 111.7(2)   | O2              | C1   | C2               | 119.43(12) | O2              | C1   | O1               | 126.86(17) |
| C2              | C1   | O2               | 120.2(2)   | O1              | C1   | C2               | 112.78(11) | O2              | C1   | C2               | 120.17(17) |
| C3              | C2   | C1               | 119.2(2)   | C3              | C2   | C1               | 120.70(12) | O1              | C1   | C2               | 112.97(15) |
| C6              | C2   | C1               | 121.3(2)   | C6              | C2   | C1               | 120.71(12) | C7              | C2   | C3               | 118.87(15) |
| C6              | C2   | C3               | 119.4(2)   | C6              | C2   | C3               | 118.43(12) | C7              | C2   | C1               | 121.48(15) |
| C4              | C3   | C2               | 119.8(2)   | C2              | C3   | C4               | 120.42(12) | C3              | C2   | C1               | 119.44(15) |
| C5              | C4   | C3               | 118.8(2)   | C3              | C4   | C7               | 119.27(12) | C4              | C3   | C2               | 120.33(16) |
| C7              | C4   | C3               | 120.7(2)   | C5              | C4   | C3               | 119.01(12) | C6              | C4   | C3               | 118.80(15) |
| C7              | C4   | C5               | 120.5(2)   | C5              | C4   | C7               | 121.66(12) | C6              | C4   | C5               | 121.45(15) |
| C4              | C5   | N1               | 120.3(2)   | N1              | C5   | C4               | 119.68(12) | C3              | C4   | C5               | 119.45(15) |
| C2              | C6   | N1               | 119.5(2)   | N1              | C6   | C2               | 120.47(12) | O4              | C5   | O3               | 127.68(16) |
| O4              | C7   | O3               | 127.4(3)   | O3              | C7   | C4               | 111.49(11) | O4              | C5   | C4               | 121.42(16) |
| C4              | C7   | O3               | 113.0(2)   | O4              | C7   | O3               | 127.97(13) | O3              | C5   | C4               | 110.90(14) |
| C4              | C7   | O4               | 119.5(2)   | O4              | C7   | C4               | 120.50(12) | N1              | C6   | C4               | 120.32(15) |
| C9              | C8   | N1               | 112.8(2)   | N1              | C8   | C9               | 114.69(11) | N1              | C7   | C2               | 120.05(15) |
| C10             | C9   | C8               | 120.7(3)   | C10             | C9   | C8               | 120.76(13) | N1              | C8   | C9               | 111.37(13) |
| C14             | C9   | C8               | 120.0(2)   | C13             | C9   | C8               | 119.77(13) | C10             | C9   | C14              | 119.30(16) |
| C14             | C9   | C10              | 119.3(3)   | C13             | C9   | C10              | 119.23(13) | C10             | C9   | C8               | 120.55(15) |
| C11             | C10  | C9               | 120.5(3)   | C11             | C10  | C9               | 120.18(14) | C14             | C9   | C8               | 120.14(15) |
| C12             | C11  | C10              | 120.4(3)   | C10             | C11  | C12              | 120.93(14) | C9              | C10  | C11              | 120.16(16) |
| C13             | C12  | C11              | 118.8(3)   | C11             | C12  | C14              | 118.93(14) | C12             | C11  | C10              | 120.66(16) |
| C15             | C12  | C11              | 120.2(3)   | C11             | C12  | C15              | 119.42(13) | C11             | C12  | C13              | 118.90(16) |
| C15             | C12  | C13              | 120.9(3)   | C14             | C12  | C15              | 121.64(13) | C11             | C12  | C15              | 120.71(16) |

|     |     |     |          |     |     |     |            |     |     |     |            |
|-----|-----|-----|----------|-----|-----|-----|------------|-----|-----|-----|------------|
| C14 | C13 | C12 | 120.9(3) | C9  | C13 | C14 | 120.57(13) | C13 | C12 | C15 | 120.06(16) |
| C13 | C14 | C9  | 120.0(3) | C12 | C14 | C13 | 120.10(13) | C14 | C13 | C12 | 120.70(17) |
| C16 | C15 | C12 | 120.1(3) | C16 | C15 | C12 | 120.04(15) | C13 | C14 | C9  | 120.22(16) |
| C20 | C15 | C12 | 120.7(3) | C16 | C15 | C20 | 118.10(15) | C16 | C15 | C20 | 117.97(16) |
| C20 | C15 | C16 | 119.1(3) | C20 | C15 | C12 | 121.85(13) | C16 | C15 | C12 | 115.57(16) |
| C17 | C16 | C15 | 120.2(3) | C17 | C16 | C15 | 120.82(18) | C20 | C15 | C12 | 126.46(16) |
| C18 | C17 | C16 | 120.3(3) | C18 | C17 | C16 | 120.24(17) | C17 | C16 | C15 | 121.60(18) |
| C19 | C18 | C17 | 119.7(3) | C19 | C18 | C17 | 120.24(17) | C18 | C17 | C16 | 120.18(18) |
| C20 | C19 | C18 | 120.2(3) | C18 | C19 | C20 | 119.98(19) | C19 | C18 | C17 | 119.10(18) |
| C19 | C20 | C15 | 120.5(3) | C15 | C20 | C21 | 120.36(13) | C18 | C19 | C20 | 121.56(17) |
|     |     |     |          | C19 | C20 | C15 | 120.61(15) | C19 | C20 | C15 | 119.53(17) |
|     |     |     |          | C19 | C20 | C21 | 118.99(16) | C19 | C20 | C21 | 115.04(16) |
|     |     |     |          | N2  | C21 | C20 | 178.71(17) | C15 | C20 | C21 | 125.40(15) |
|     |     |     |          |     |     |     |            | O6  | C21 | O5  | 122.42(17) |
|     |     |     |          |     |     |     |            | O6  | C21 | C20 | 123.13(16) |
|     |     |     |          |     |     |     |            | O5  | C21 | C20 | 114.45(15) |

**1** <sup>1</sup>1-X,+Y,1/2-Z;<sup>2</sup>1-X,3-Y,1-Z;<sup>3</sup>+X,3-Y,-1/2+Z;<sup>4</sup>+X,3-Y,1/2+Z; **2** <sup>1</sup>1-X,+Y,3/2-Z;<sup>2</sup>1-X,2-Y,1-Z;<sup>3</sup>+X,2-Y,1/2+Z

**3** <sup>1</sup>1-X,+Y,3/2-Z;<sup>2</sup>+X,2-Y,1/2+Z;<sup>3</sup>1-X,2-Y,1-Z

**Table S4. Comparison of selected bond lengths and angles of 1–3.**

| Compound | Zn-O bond lengths (Å)        | O-Zn-O bond angles (°)               | N1-C8-C9 bond angles (°) |
|----------|------------------------------|--------------------------------------|--------------------------|
| <b>1</b> | Zn1-O1 1.935<br>Zn1-O3 1.937 | O1-Zn1-O1 <sup>1</sup>               | 114.78                   |
|          |                              | O3 <sup>2</sup> -Zn1-O1              | 97.13                    |
|          |                              | O3 <sup>3</sup> -Zn1-O1 <sup>1</sup> | 97.13                    |
|          |                              | O3 <sup>2</sup> -Zn1-O1 <sup>1</sup> | 120.58                   |
|          |                              | O3 <sup>3</sup> -Zn1-O1              | 120.58                   |
|          |                              | O3 <sup>3</sup> -Zn1-O3 <sup>2</sup> | 123.69                   |
| <b>2</b> | Zn1-O1 1.930<br>Zn1-O3 1.936 | O1-Zn1-O1 <sup>1</sup>               | 112.03                   |
|          |                              | O3 <sup>2</sup> -Zn1-O1              | 96.66                    |
|          |                              | O3 <sup>3</sup> -Zn1-O1 <sup>1</sup> | 96.99                    |
|          |                              | O3 <sup>2</sup> -Zn1-O1 <sup>1</sup> | 120.03                   |
|          |                              | O3 <sup>3</sup> -Zn1-O1              | 120.03                   |
|          |                              | O3 <sup>3</sup> -Zn1-O3 <sup>2</sup> | 113.07                   |
| <b>3</b> | Zn1-O1 1.931<br>Zn1-O3 1.933 | O1-Zn1-O1 <sup>1</sup>               | 117.73                   |
|          |                              | O3 <sup>2</sup> -Zn1-O1              | 90.10                    |
|          |                              | O3 <sup>3</sup> -Zn1-O1 <sup>1</sup> | 90.10                    |
|          |                              | O3 <sup>2</sup> -Zn1-O1              | 122.74                   |
|          |                              | O3 <sup>3</sup> -Zn1-O1              | 122.74                   |
|          |                              | O3 <sup>3</sup> -Zn1-O3 <sup>2</sup> | 116.72                   |

**1** <sup>1</sup>1-X,+Y,1/2-Z;<sup>2</sup>1-X,3-Y,1-Z;<sup>3</sup>+X,3-Y,-1/2+Z; **2** <sup>1</sup>1-X,+Y,3/2-Z;<sup>2</sup>1-X,2-Y,1-Z;<sup>3</sup>+X,2-Y,1/2+Z

**Table S5. The fitting parameters of the lifetime of 1–3.**

| Compound         | Temperature(K) | $\lambda_1$ (nm) | $\lambda_2$ (nm) | $\tau_1$ (ns) <sup>a</sup> | $\tau_2$ (ms) <sup>b</sup> |
|------------------|----------------|------------------|------------------|----------------------------|----------------------------|
| <b>L1</b>        | 298            | 397              | /                | 2.88(19.37%)               | /                          |
|                  |                |                  |                  | 8.97(80.63%)               | /                          |
| <b>L2</b>        | 298            | 404              | /                | 1.44(37.97%)               | /                          |
|                  |                |                  |                  | 4.84(62.03%)               | /                          |
| <b>L3</b>        | 298            | 437              |                  | 4.04(12.18%)               |                            |
| <b>1</b>         | 100            | 411              | 573              | 1.01(23.11%)               | 10.90(4.40%)               |
|                  |                |                  |                  | 3.30(55.08%)               | 147.20(28.43%)             |
|                  |                |                  |                  | 12.20(21.80%)              | 501.60(67.17%)             |
|                  | 298            | 420              | 580              | 0.83(21.19%)               | 0.84(9.11%)                |
|                  |                |                  |                  | 3.25(45.70%)               | 4.10(18.37%)               |
|                  |                |                  |                  | 12.65(33.10)               | 16.92(72.52%)              |
| <b>2</b>         | 298            | 450              | 570              | 1.94(61.64%)               | 0.70(8.98%)                |
|                  |                |                  |                  | 9.25(38.36%)               | 2.69(30.44%)               |
|                  |                |                  |                  |                            | 10.39(27.69%)              |
|                  |                |                  |                  |                            | 64.45(32.89%)              |
| <b>3</b>         | 298            | 450              | 605              | 0.73(58.54%)               | 1.07(39.19%)               |
|                  |                |                  |                  | 2.46(41.46%)               | 4.84(31.08%)               |
|                  |                |                  |                  |                            | 19.37(17.60%)              |
| <sup>a</sup> The |                |                  |                  |                            | 144.5(12.13%)              |

lifetime corresponding to the  $\lambda_1$ . <sup>b</sup> The lifetime corresponding to the  $\lambda_2$ .

**Table S6. The comparison of cell parameters before and after structural optimizations.\***

|                    | <b>1</b> |        | <b>2</b> |        | <b>3</b> |        |
|--------------------|----------|--------|----------|--------|----------|--------|
|                    | expt     | opt    | expt     | opt    | expt     | opt    |
| a / Å              | 28.723   | 28.723 | 28.420   | 28.420 | 31.265   | 31.264 |
| b / Å              | 7.883    | 7.883  | 8.408    | 8.408  | 8.071    | 8.071  |
| c / Å              | 14.575   | 14.568 | 14.546   | 14.546 | 14.877   | 14.876 |
| $\alpha$           | 90.00    | 90.00  | 90.00    | 90.00  | 90.00    | 90.00  |
| $\beta$            | 91.79    | 91.79  | 96.86    | 96.86  | 103.09   | 103.09 |
| $\gamma$           | 90.00    | 90.00  | 90.00    | 90.00  | 90.00    | 90.00  |
| V / Å <sup>3</sup> | 3298.5   | 3298.4 | 3450.6   | 3450.6 | 3656.5   | 3656.5 |



\*Since there is no obvious change before and after structural optimizations, the optimized crystallographic data were adopted for all calculations.

## References

1. Kresse, G.; Furthmüller, J. Efficiency of Ab-Initio Total Energy Calculations for Metals and Semiconductors Using a Plane-Wave Basis Set. *Comp. Mater. Sci.* 1996, **6**, 15-50.
2. Perdew, J. P. ; Burke, K.; Ernzerhof, M. Generalized Gradient Approximation Made Simple. *Phys. Rev. Lett.* 1996, **77**, 3865-3868.
3. Kresse, G.; Joubert, D. From Ultrasoft Pseudopotentials to the Projector Augmented-Wave Method. *Phys. Rev. B* 1999, **59**, 1758-1775.
4. Grimme, S.; Antony, J.; Ehrlich, S.; Krieg, H. A Consistent and Accurate Ab Initio Parametrization of Density Functional Dispersion Correction (DFT-D) for the 94 Elements H-Pu. *J. Chem. Phys.* 2010, **132**, 154104.
5. V. Wang, Y.-Y. Liang, Y. Kawazeo, W.-T. Geng, High-Throughput Computational Screening of Two-Dimensional Semiconductors, arXiv:1806.04285.
